# Supplementary material for: Modulation of microRNA-375 expression alters voltage-gated Na+ channel properties and exocytosis in insulin-secreting cells
Source: PubMed Central journal article supplement — Acta Physiol (Oxf). 2015 Feb 15;213(4):882–92. doi: 10.1111/apha.12460 (PMC4413049; doi:10.1111/apha.12460), 2015-02-15
Supplement: apha0213-0882-sd1.pdf [file apha0213-0882-sd1.pdf]

## Supplementary information

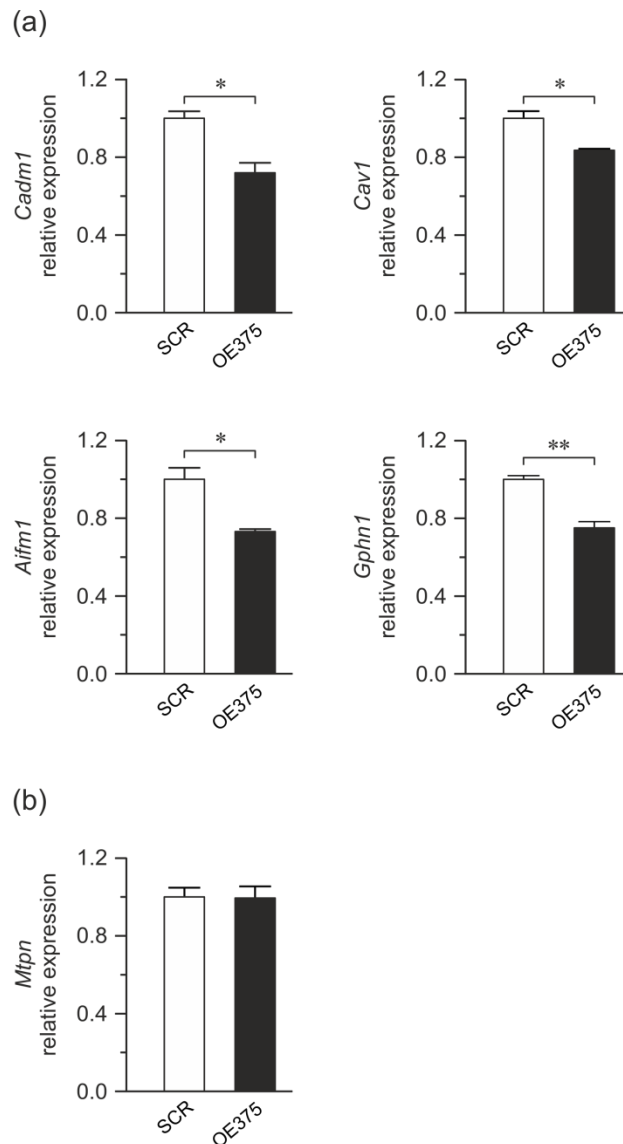

**Supplementary Figure 1.** Exploration of verified mouse beta-cell targets for miR-375 in INS1-832/13 cells. The relative expression of (a) *Cadm1*, *Cav1*, *Aifm1* and *Gphn* and (b) *Mtpn* in OE375 (black bars) normalized to control (SCR; white bars). Data are expressed as mean  $\pm$  SEM of three biological experiments with three technical replicates in each experiment. \* $P \leq 0.05$ ; \*\* $P \leq 0.01$
